# Supplementary material for: Body Adiposity Partially Mediates the Association between FTO rs9939609 and Lower Adiponectin Levels in Chilean Children
Source: MDPI journal article supplement (doi:10.3390/children10030426), 2023-02-22
Supplement: s1 [file s1]

## Body adiposity partially mediates the association between FTO rs9939609 and lower adiponectin levels in Chilean children

Carolina Ochoa-Rosales, Lorena Mardones, Marcelo Villagrán, Claudio Aguayo, Miquel Martorell, Benilde Riffo, Carlos Celis-Morales and Natalia Ulloa, on behalf of ELHOC Consortium

### SUPPLEMENTARY FIGURES

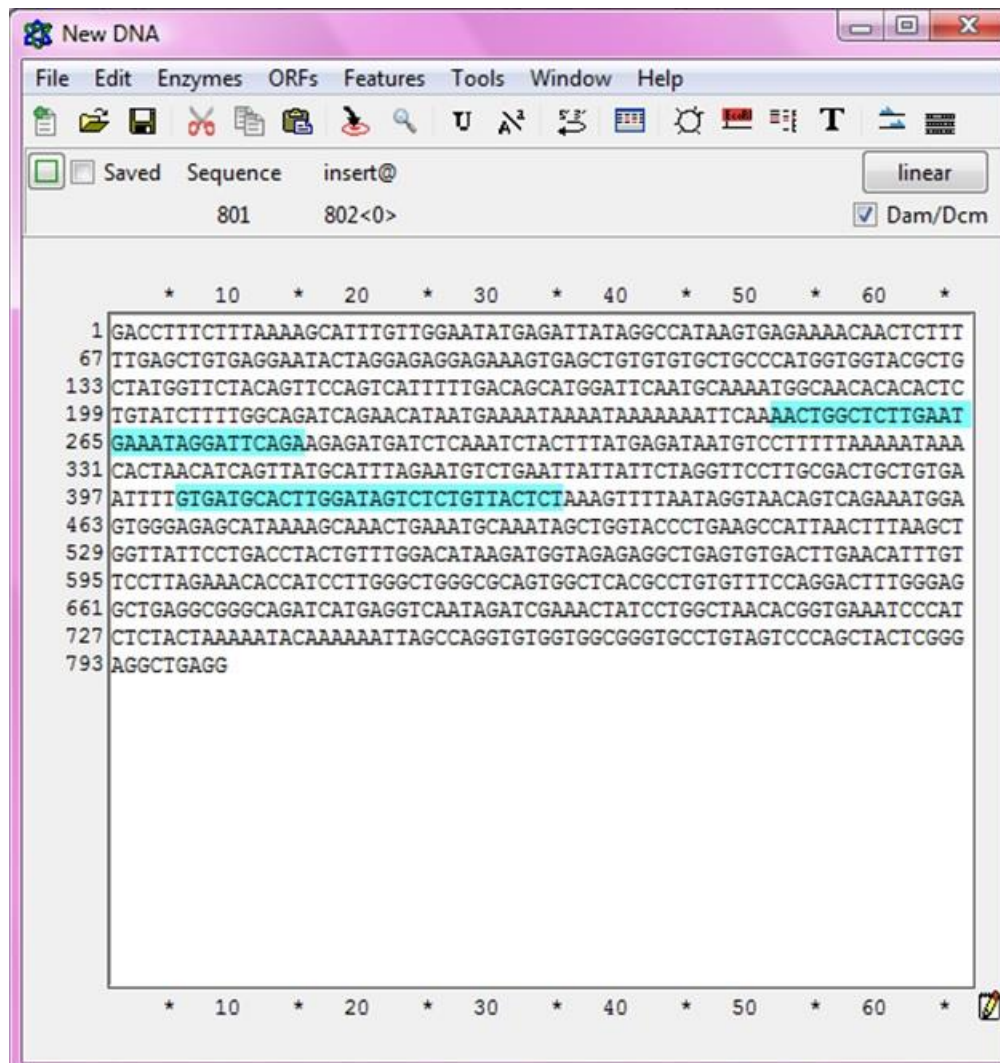

**Supplementary Figure S-1:** The figure shows the sequence of the polymerase chain reaction (PCR) product. Sequences highlighted in calypso color represent forward (5' AACTGGCTCTTGAATGAAATAGGATTTCAGA 3') and reverse primers (5'-GTGATGCACTTGGATAGTCTCTGTTACTCT-3').

a)

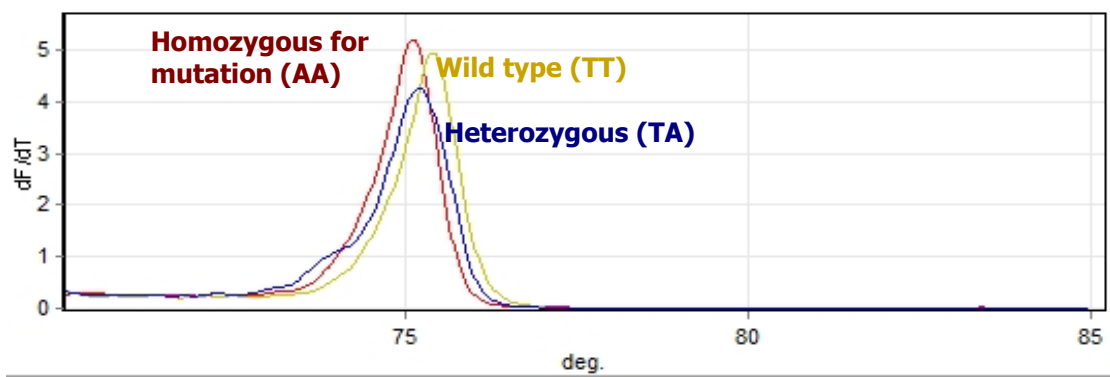

b)

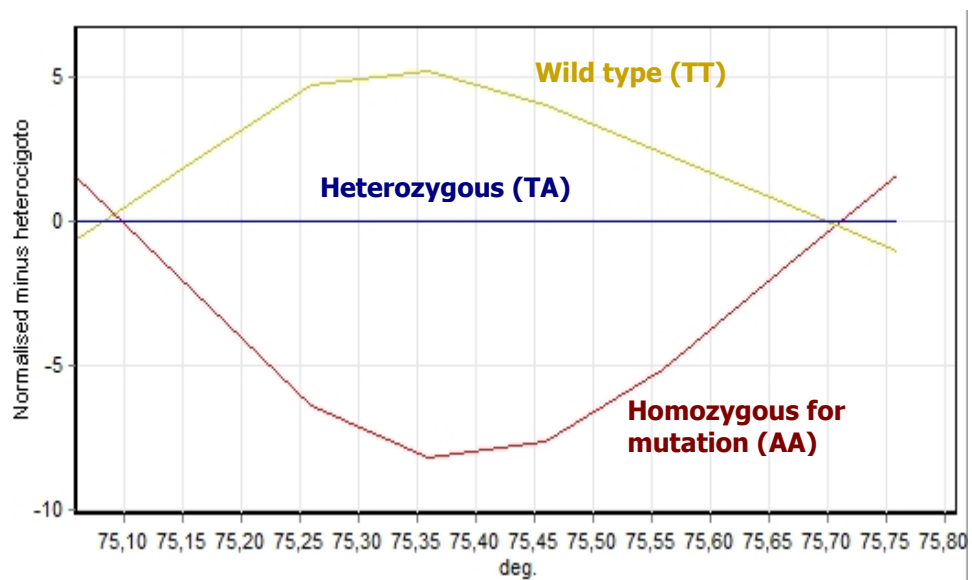

**Supplementary Figure S-2:** High Resolution Melting (HRM) curves for genetic variants of *FTO* rs9939609. Figure S-2 a) shows the differential melting curves, one for each genotype. Figure S-2 b) shows the differential melting curves normalized with respect to the heterozygous genotype (TA).

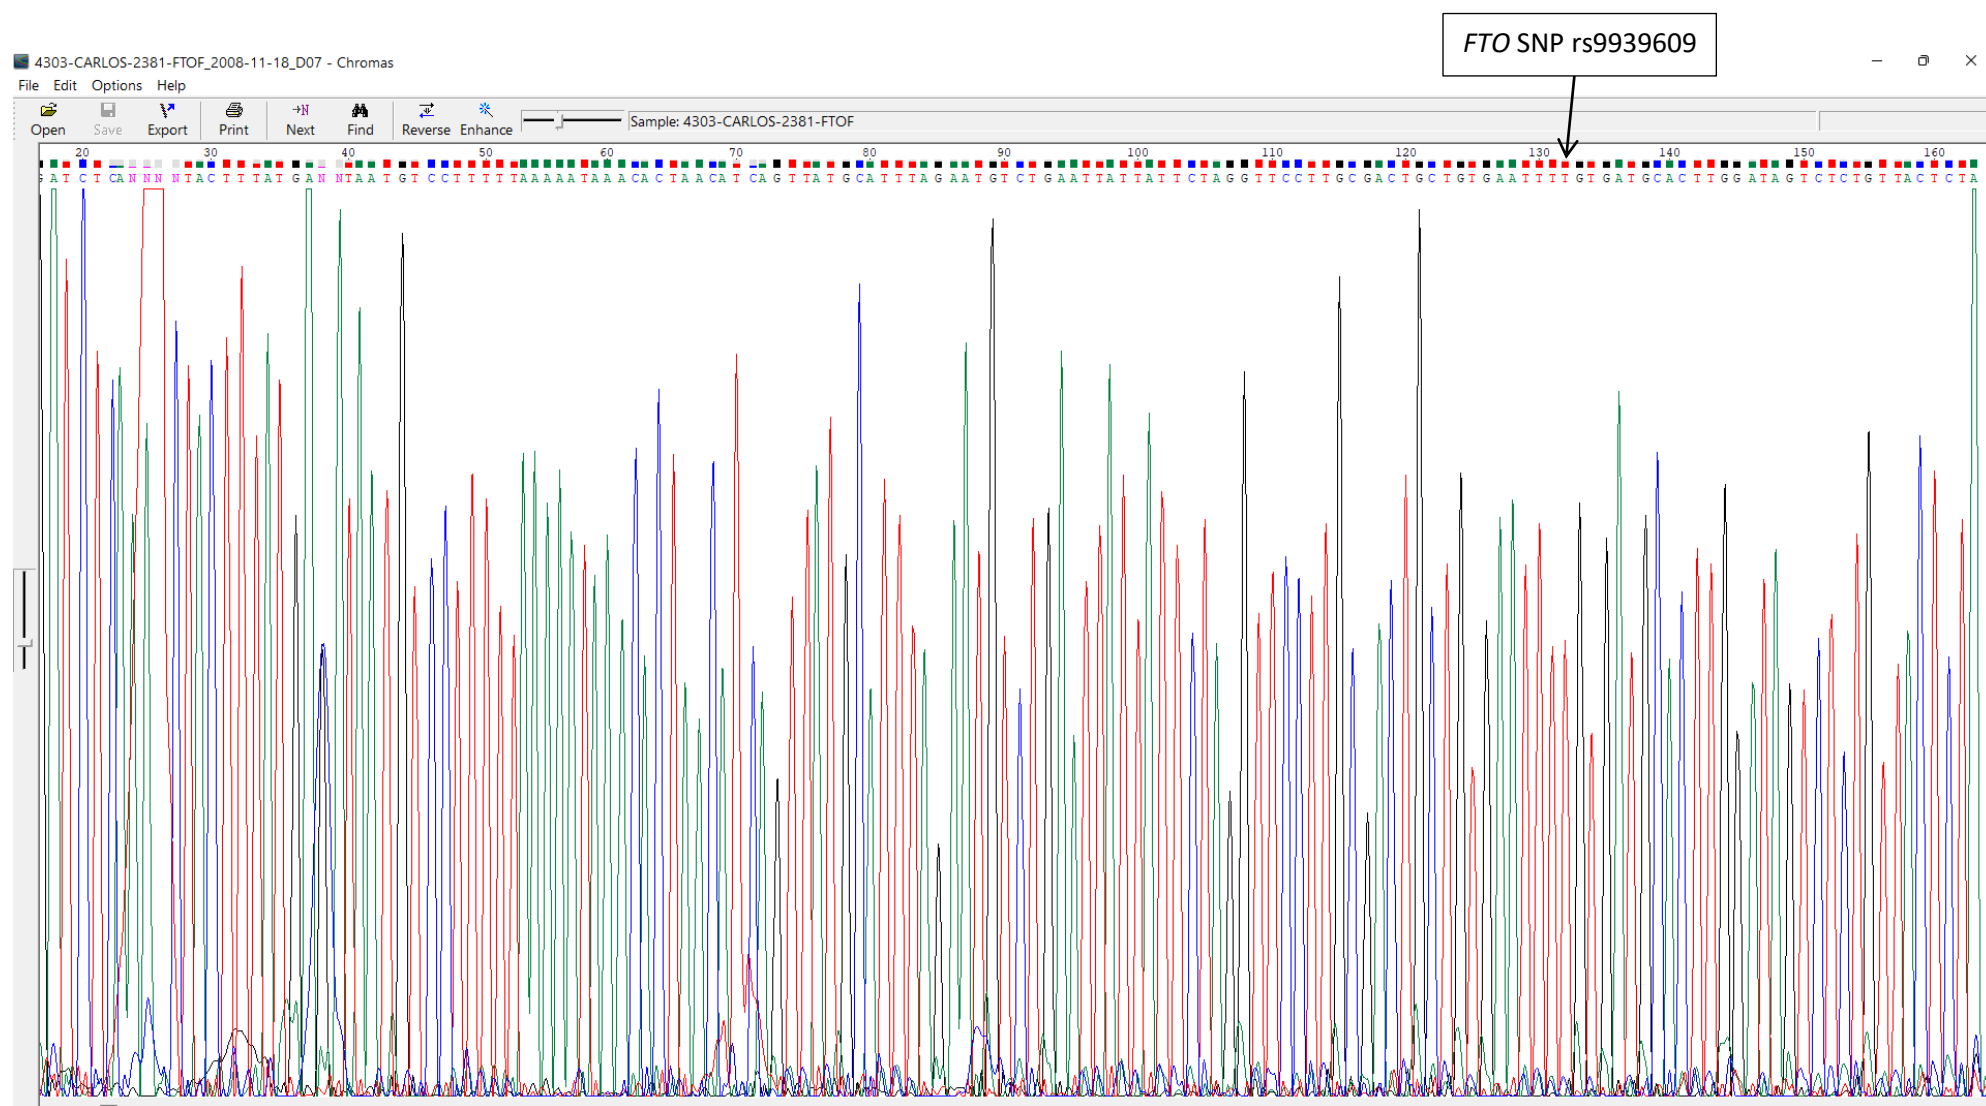

**Supplementary Figure S-3:** Figure shows the sequencing data of one of the control samples owning a wild type allele (T)
